# Supplementary material
Source: PubMed Central journal article supplement (PMC3320765)

**Figure S1, Tang *et al.***

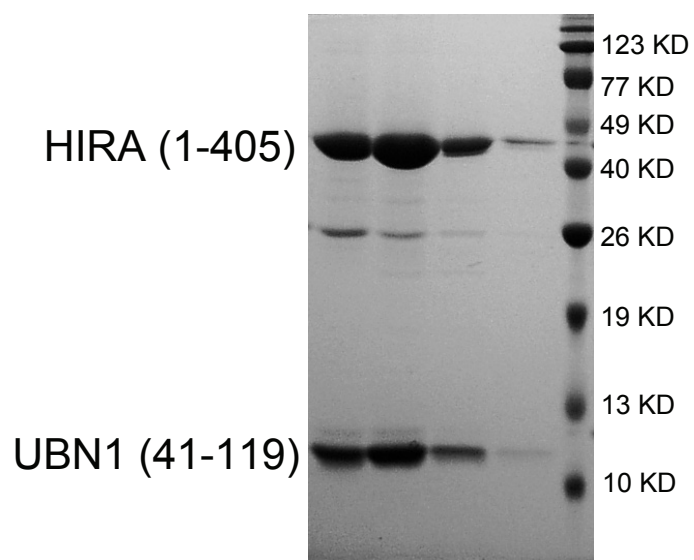

**Figure S2, Tang *et al.***

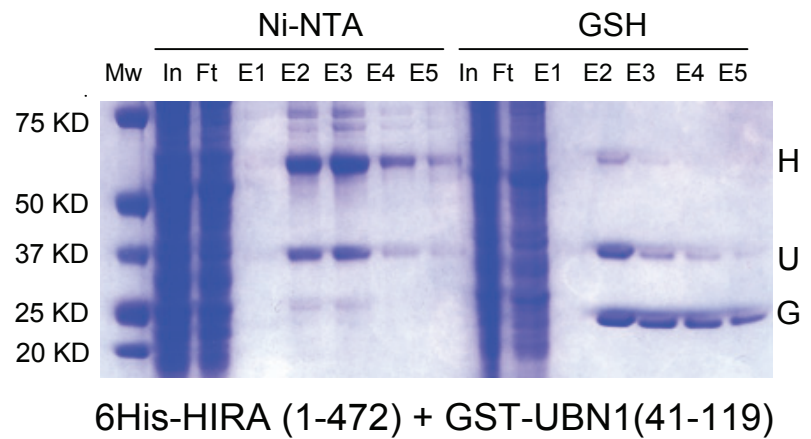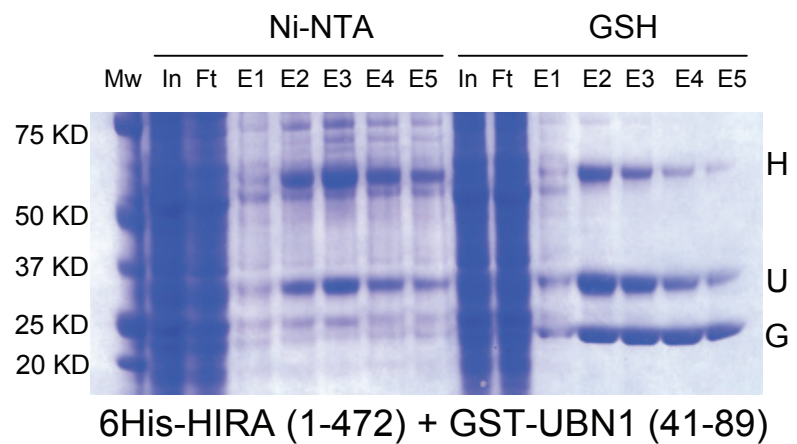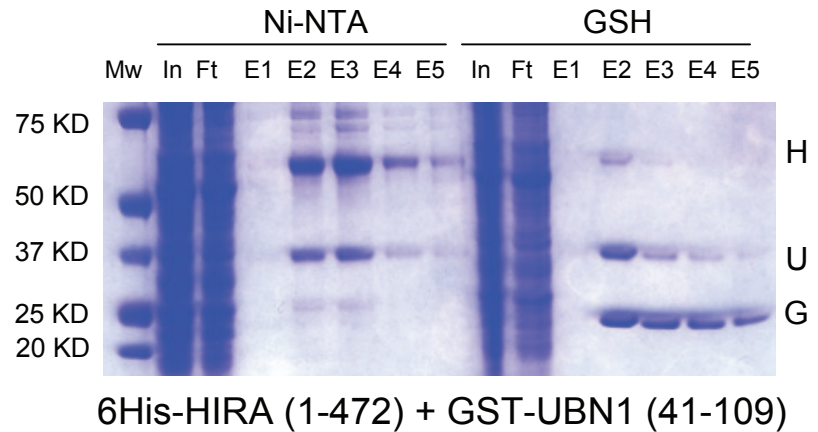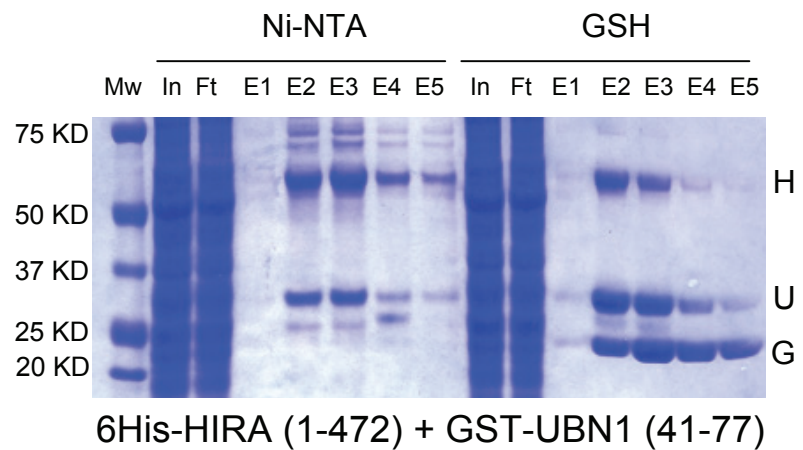

Figure S3, Tang *et al.*

A

14K, 0.6 OD

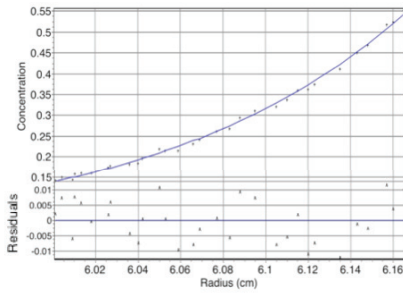

14K, 0.4 OD

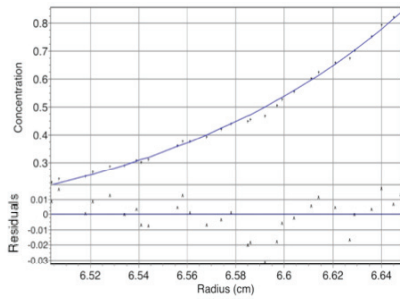

14K, 0.2 OD

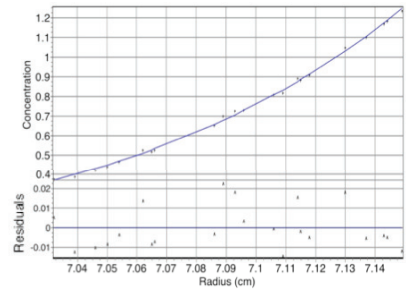

22K, 0.6 OD

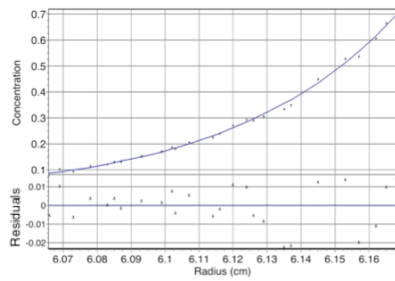

22K, 0.4 OD

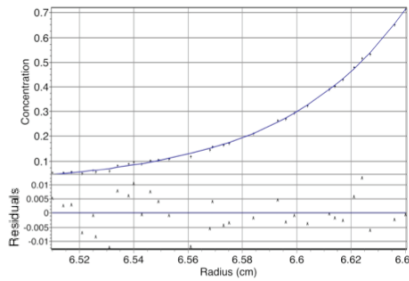

22K, 0.2 OD

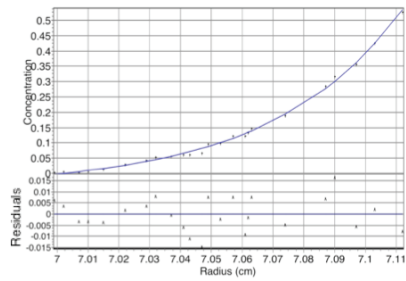

32K, 0.6 OD

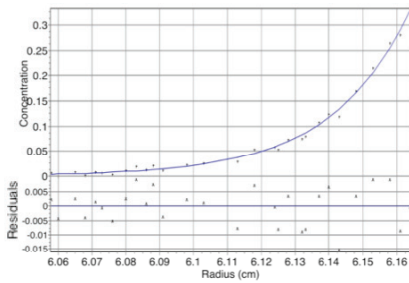

32K, 0.4 OD

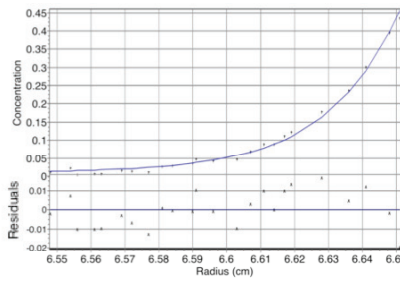

32K, 0.2 OD

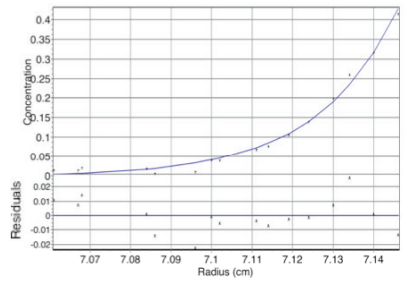

# Figure S3 (continued), Tang *et al.*

## B

### 14K, 0.6 OD

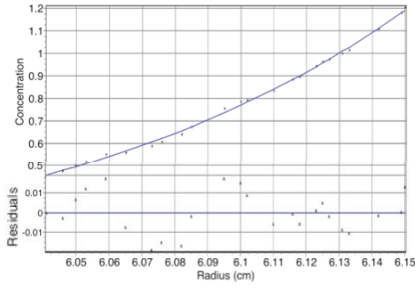

### 14K, 0.4 OD

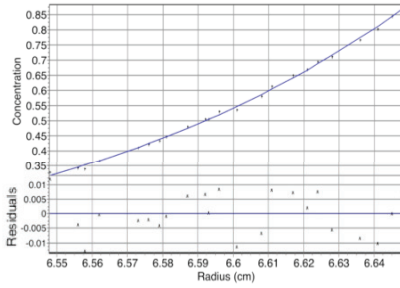

### 14K, 0.2 OD

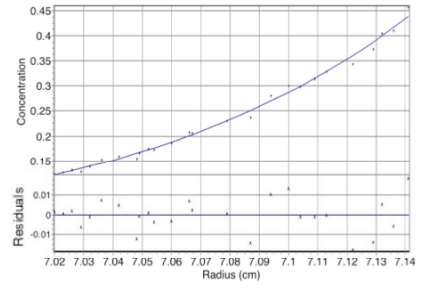

### 22K, 0.6 OD

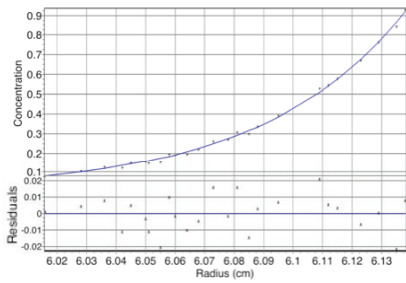

### 22K, 0.4 OD

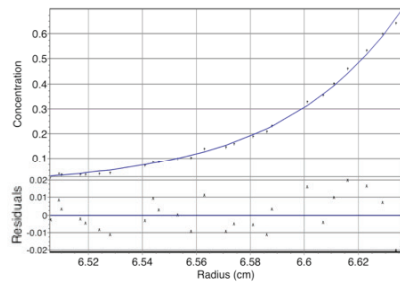

### 22K, 0.2 OD

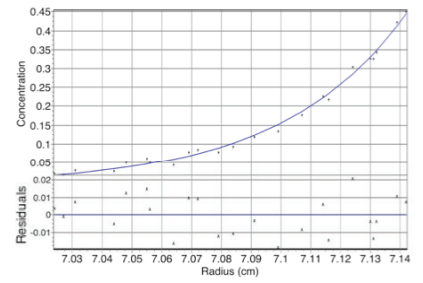

### 32K, 0.6 OD

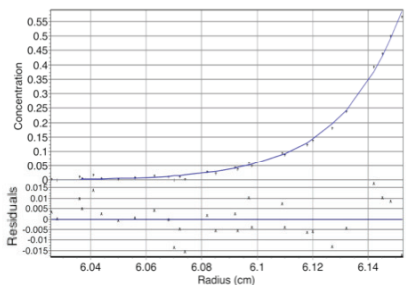

### 32K, 0.4 OD

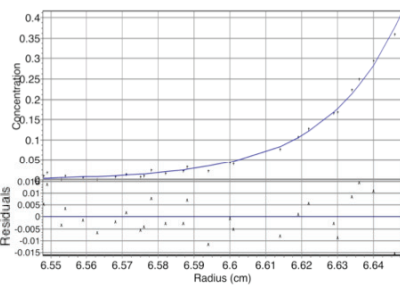

### 32K, 0.2 OD

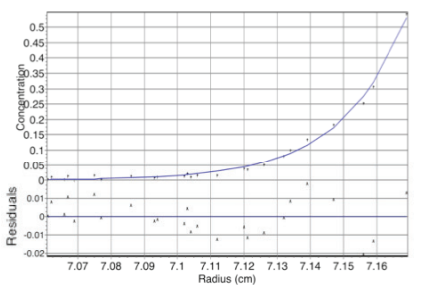

Figure S4, Tang *et al.*

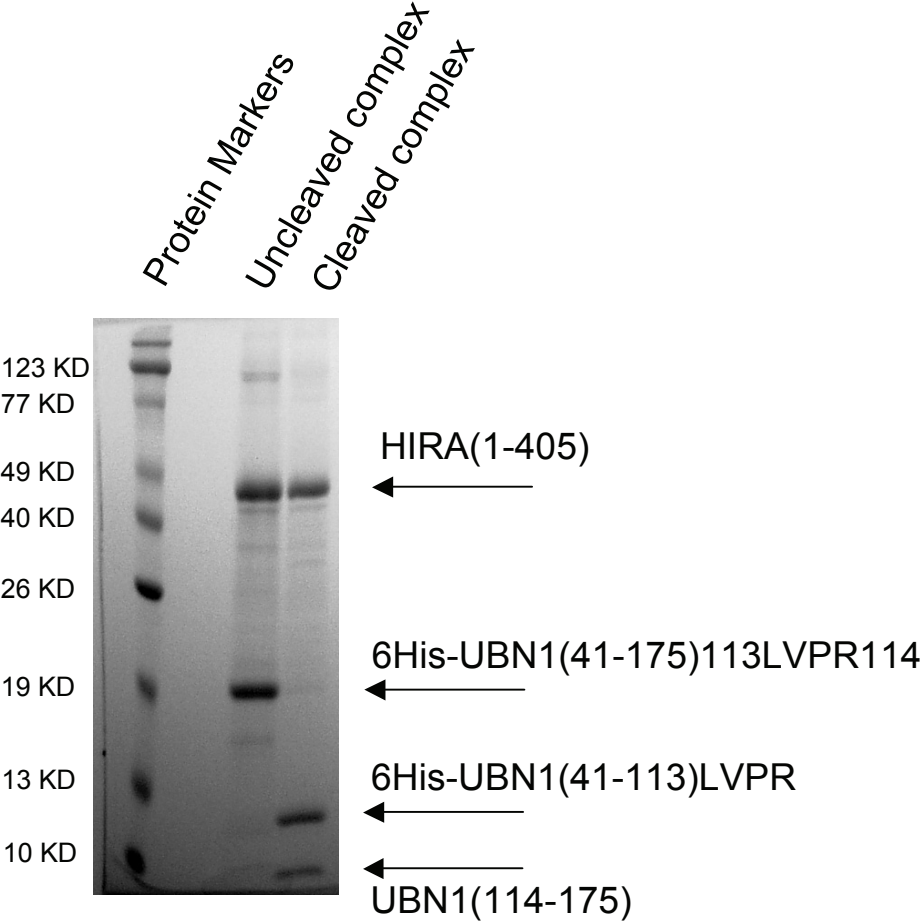

**Figure S5, Tang et al.**

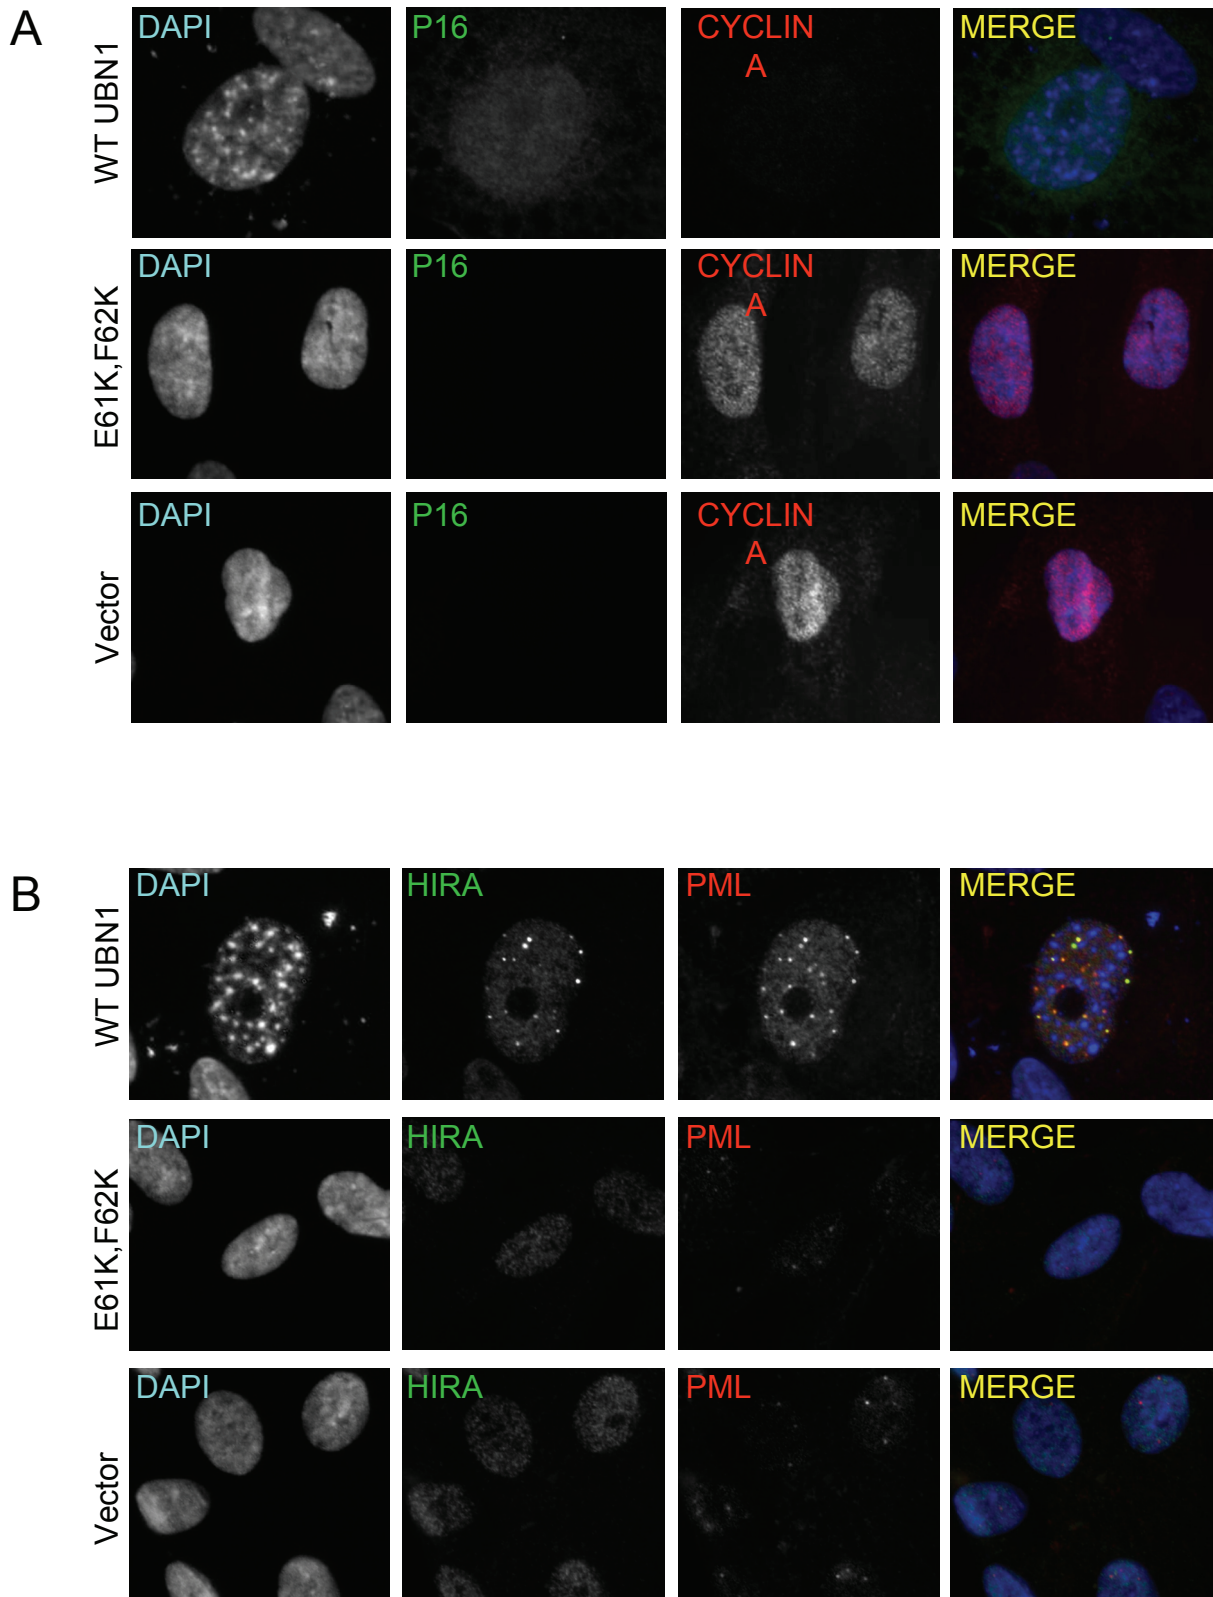

Supplement: NIHMS364923-supplement-2_si_002.pdf [file NIHMS364923-supplement-2_si_002.pdf]
