# Supplementary material
Source: PubMed Central journal article supplement (PMC3320765)
Supplement: NIHMS364923-supplement-1_si_001.pdf [file NIHMS364923-supplement-1_si_001.pdf]

## SUPPLEMENTAL FIGURE LEGENDS

**Figure S1:** The UBN1 HRD is dispensable for HIRA binding. A 6His-UBN1(41-119)/HIRA(1-405) complex could be purified to homogeneity through multi-step chromatography, with the monodisperse size exclusion fractions shown.

**Figure S2:** UBN1 proteins with HRD truncations still form stable complexes with HIRA(1-472) **A)** GST-UBN1(41-119); **B)** GST-UBN1(41-109); **C)** GST-UBN1(41-89); and **D)** GST-UBN1(41-77). Left panels show the Ni-NTA purification, while the right panels show the GST purification of the same production. H–HIRA; U–UBN1; G–Proteolyzed GST moiety; Mw–molecular weight markers; In–Ni-NTA input; FT–Ni-NTA flow-through; Elution–Ni-NTA fractions at increasing Imidazole concentration.

**Figure S3.** Full collection of the sedimentation equilibrium data for **A)** the HIRA(1-405)/UBN1(41-119) complex and **B)** the HIRA(1-405)/UBN1(41-175) complex. Data was collected at three centrifugation speeds (14,276, 22,277, and 32281 r.p.m.) and three protein concentrations ( $OD_{280} = 0.6, 0.4$ , and  $0.2$ ) and was globally fit to a  $(UBN1)_1/(HIRA)_1$  single-species model. The data in **A)** fits to the molecular weight of the HIRA(1-405)/UBN1(41-119) complex (58.0 kDa) with an RMS deviation of 0.00950, while the data in **B)** fits to the molecular weight of the complex (67.0 kDa) with an RMS deviation of 0.00986.

**Figure S4:** 6His-UBN1(41-175)113LVPR114/HIRA(1-405) complex was purified to homogeneity and subjected to thrombin cleavage that cuts between UBN1 residues 113 and 114. Left lane: uncleaved complex after size exclusion chromatography; Right lane: Cleaved complex indicating the generation of the NHRD and HRD fragments by thrombin protease.

**Figure S5.** Ectopically expressed UBN1 WT, but not the (E61K,F62K) NHRD mutant, induces selected markers of cell senescence. Cells were infected with retroviruses as in Figure 8. **A)** 28 days later, cells were stained with DAPI and anti-p16 (Santa Cruz sc-56330: mouse monoclonal IgG<sub>2a</sub>) and anti-cyclin A (Santa Cruz sc-751 rabbit polyclonal) antibodies and visualized by immunofluorescence. **B)** 28 days later cells were stained with DAPI and anti-HIRA (mouse monoclonal WC cocktail IgG1) and anti-PML (Santa Cruz sc-5621 rabbit polyclonal) antibodies and visualized by immunofluorescence.
